# Supplementary material
Source: publisher figshare collection journal article supplement (https://acs.figshare.com/ndownloader/files/5382680)
Supplement: Supplementary file 1 [file 5382680]

## Supporting Information

### Structure-Activity Relationship of $^{18}\text{F}$ -labeled phosphoramidate peptidomimetic Prostate-Specific Membrane Antigen (PSMA)-targeted inhibitor analogues for PET imaging of prostate cancer

*Shorouk Dannoon*<sup>1#</sup>, *Tanushree Ganguly*<sup>2#</sup>, *Hendry Cahaya*<sup>1</sup>, *Jonathan J. Geruntho*<sup>2</sup>, *Matthew S. Galliher*<sup>2</sup>, *Sophia K. Beyer*<sup>2</sup>, *Cindy J. Choy*<sup>2</sup>, *Mark R. Hopkins*<sup>2</sup>, *Melanie Regan*<sup>1</sup>, *Joseph E. Blecha*<sup>1</sup>, *Lubica Skultetyova*<sup>3</sup>, *Christopher R. Drake*<sup>1</sup>, *Salma Jivan*<sup>1</sup>, *Cyril Barinka*<sup>3</sup>, *Ella F. Jones*<sup>1§</sup>, *Clifford E. Berkman*<sup>2,4§\*</sup>, *Henry F. VanBrocklin*<sup>1§\*</sup>

<sup>1</sup>Department of Radiology and Biomedical Imaging, University of California San Francisco, USA; <sup>2</sup>Department of Chemistry, Washington State University, USA; <sup>3</sup>Institute of Biotechnology, CR, Prague; <sup>4</sup>Cancer Targeted Technology, USA

# Contributed equally

§ Contributed equally as senior authors

**\*Correspondence to:**

Prof. Henry F. VanBrocklin  
Department of Radiology and Biomedical Imaging  
University of California San Francisco  
185 Berry Street, Suite 350  
San Francisco, CA 94107  
tel: (415) 353-4569  
fax: (415) 514-8242  
[henry.vanbrocklin@ucsf.edu](mailto:henry.vanbrocklin@ucsf.edu)

\* Prof. Clifford E. Berkman  
Department of Chemistry  
Washington State University  
Pullman, WA 99164-4630.  
tel: (509) 335-7613  
fax: (509) 335-8389.  
[cberkman@wsu.edu](mailto:cberkman@wsu.edu)

**Table of contents:**

|                  |                                                                   |
|------------------|-------------------------------------------------------------------|
| <b>Section 1</b> | Synthesis of <b>7</b> and precursors                              |
| <b>Section 2</b> | IC <sub>50</sub> and Mode of inhibition determinations            |
| <b>Section 3</b> | Crystallographic studies - Structure determination and refinement |

## Section 1: Synthesis of 7 and precursors.

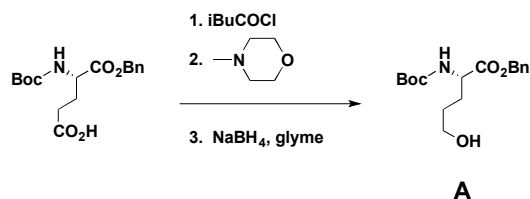

**Benzyl 2-((tert-butoxycarbonyl)amino)-5-hydroxypentanoate, A.** Boc-Glu(OBn) (1g, 1 equiv) and *N*-Methylmorpholine (3.55 mmol, 1.2 equiv) were dissolved in 3 mL glyme and stirred at -15°C. iso-Butyloxycarbonyl chloride (2.96 mmol, 1 equiv) was then added and stirred for an additional 15 min. The resulting white precipitate was filtered off and NaBH<sub>4</sub> (4.44 mmol, 1.5 equiv) was added to the filtrate along with 4 mL of water and stirred for 15 min. The reaction mixture was dissolved in ethylacetate (EtOAc) and extracted with brine thrice. The organic layer was dried over Mg<sub>2</sub>SO<sub>4</sub> and rotary-evaporated at 40°C. Pure product was obtained on drying (0.726 g, 76%). Characterization confirmed formation of the product.

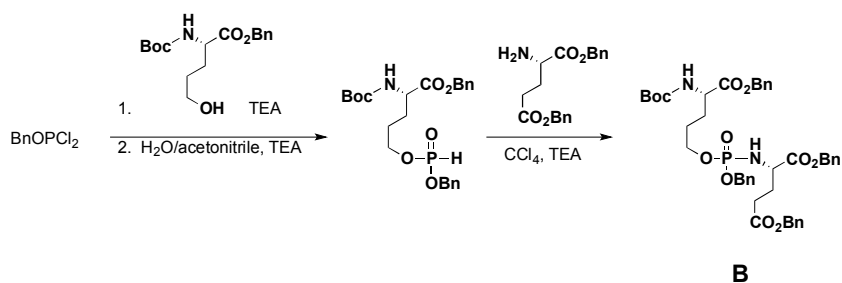

**Dibenzylyl 2-(((R)-(benzyloxy))((R)-5-(benzyloxy)-4-((tert-butoxycarbonyl)amino)-5-oxopentyl)oxy)phosphoryl)amino)pentanedioate, B.** In a flame dried 100 mL flask, 10 mL dry dichloromethane (DCM) was taken, argon flushed and cooled over dried ice. PCl<sub>2</sub>OBn (2.31 mM, 1.5 equiv) and triethylamine (1.855 mM, 1.2 equiv) was added and stirred. **A** (1.56 mM, 1 equiv) was dissolved in 10 mL of DCM and added to the reaction mixture in parts. After complete addition, dry ice was replaced with ice bath and stirred for 5 h. 1:1 mixture of water:acetonitrile (ACN) was added and stirred for additional 1 h. The reaction mixture was rotary-evaporated to remove the organic solvent, dissolved in EtOAc, and washed successively with 10% HCl, 10% NaHCO<sub>3</sub>, and brine. Organic layer was dried, concentrated to remove solvent, and dried overnight. Crude phosphite was dissolved in 10 mL dry ACN, flushed with argon(g), cooled on ice and 5 mL of CCl<sub>4</sub> was added. NH<sub>2</sub>-Glu(OBn)<sub>2</sub> (1.546 mM, 1 equiv) and TEA (4.638 mM, 3.2 equiv) together were dissolved in 10 mL ACN and added to the phosphite in parts and stirred for 5 h. The reaction mixture was concentrated and purified by C-18 column chromatography using 80:20 MeOH:water as the mobile phase. Product **B** was obtained as pale yellow oil (36.7% yield). <sup>1</sup>H NMR (300 MHz, CDCl<sub>3</sub>): δ 2.04 (s, 9H), 2.05–2.06 (m, 3H), 2.07 (m, 4H), 2.09 (m, 4H), 3.48–3.52 (m, 1H), 3.91 (t, 4H), 4.94 (m, 4H), 5.07 (m, 4H), 7.30–7.31 (m, 20H). <sup>13</sup>C NMR (300 MHz, CDCl<sub>3</sub>): δ 28.5, 28.9, 30.0, 53.8, 53.9, 66.6, 66.7, 67.2, 67.5, 76.9, 77.3, 77.7, 135.5, 154.8, 172.61, 172.65. <sup>31</sup>P NMR (300

MHz, CDCl<sub>3</sub>):  $\delta$  8.41, 8.44. ESI mass spectroscopy (M+Na): Calculated 802.3, found 825.3 for C<sub>43</sub>H<sub>51</sub>N<sub>2</sub>O<sub>11</sub>P<sup>+</sup>.

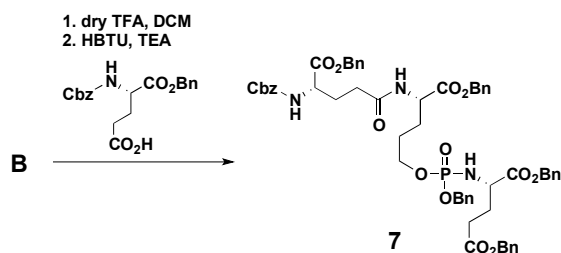

**(2S)-dibenzyl 2-(((benzyloxy) (((S)-5-(benzyloxy)-4-((S)-5-(benzyloxy)-4-((tert-butoxycarbonyl)amino)-5-oxopentanamido)-5-oxopentyl)oxy)phosphoryl)amino) pentanedioate, 7.** Cbz-Glu(OBn) (0.15g, 1equiv) was dissolved in 3mL of dry DMF in a flame dried flask and argon flushed. HBTU (0.44mmol, 1.1 equiv.) and triethylamine (0.44mmol, 1.1 equiv.) was added and stirred for 30 minutes for pre-activation of the carboxylic acid. In a separate flask, **B** was dissolved in 2mL dry DCM, argon flushed and cooled over ice bath. 1mL of dry TFA was added and stirred for 15 min. DCM was then evaporated off, reaction mixture dissolved in ethylacetate and washed with 10% NaHCO<sub>3</sub> (till pH neutralized), brine and organic layer dried on anhy. Na<sub>2</sub>SO<sub>4</sub>. It was then redissolved in 2mL dry DMF added to the flask with the pre-activated acid and stirred overnight under Argon(g). The reaction mixture was dissolved in ethyleacetate, and washed with 10% NaHCO<sub>3</sub> and brine. Organic layer dried over Na<sub>2</sub>SO<sub>4</sub> and dried under vacuum. Purification was carried out using reversed phase C18 chromatography with 80% MeOH-water as the mobile phase. Pure **7** was isolated in 40% yield. <sup>1</sup>HNMR (300 MHz, CDCl<sub>3</sub>):  $\delta$  1.45-1.6 (m, 3H), 1.80-1.98 (m, 2H), 2.04-2.18 (m, 2H), 2.20-2.34 (m, 3H), 2.38-2.48 (m, 2H), 3.45 (m, 1H), 3.82 (t, 2h), 4.37 (m, 1H), 4.56 (m, 1H), 4.81-5.00 (m, 2h), 5.04-5.2 (m, 10H), 5.89 (d, 1H, -NH), 6.56 (d, 1H, -NH), 6.70 (d, 1H, -NH), 7.22-7.40 (m, 25H). <sup>31</sup>P NMR (300 MHz, CDCl<sub>3</sub>):  $\delta$  8.46. ESI mass spectroscopy (M+Na): calculated 1055.40 (M), found 1078.5 for C<sub>58</sub>H<sub>62</sub>N<sub>3</sub>O<sub>14</sub>P<sup>+</sup>.

## **Section 2: IC<sub>50</sub> and Mode of inhibition determinations.**

**General method of IC<sub>50</sub>.** Inhibition studies were performed as previously described with minor modifications.<sup>1, 2</sup> Description is provided in Supplementary material (Section-2). Briefly, working solutions of the substrate N-[4-phenylazo)-benzoyl]-glutamyl- $\gamma$ -glutamic acid, (PABGgG) and inhibitor were prepared in Tris buffer (50 mM, pH 7.4). Working solutions of purified PSMA were diluted in Tris buffer (50 mM, pH 7.4 containing 1% Triton X-100) to provide 15-20% conversion of substrate to product in the absence of inhibitor. A typical incubation mixture (final volume of 250  $\mu$ L) was prepared by the addition of either 25  $\mu$ L of an inhibitor solution or 25  $\mu$ L TRIS buffer (50 mM, pH 7.4) to 175  $\mu$ L TRIS buffer (50 mM, pH 7.4). PABGgG (25  $\mu$ L, 10  $\mu$ M) was added to the

above solution. The enzymatic reaction was initiated by the addition of 25  $\mu\text{L}$  of the PSMA working solution. In all cases, the final concentration of PABGgG was 1  $\mu\text{M}$  while the enzyme was incubated with five serially diluted inhibitor concentrations providing a range of inhibition from 10% to 90%. The reaction was allowed to proceed for 15 min with constant shaking at 37  $^{\circ}\text{C}$  and was terminated by the addition of 25  $\mu\text{L}$  methanolic TFA (2% v/v trifluoroacetic acid in methanol) followed by vortex. The quenched incubation mixture was quickly buffered by the addition of 25  $\mu\text{L}$   $\text{K}_2\text{HPO}_4$  (0.1 M), vortexed, and centrifuged (10 min at 7,000 g). An 85  $\mu\text{L}$  aliquot of the resulting supernatant was subsequently quantified by HPLC as previously described.<sup>3, 4</sup>  $\text{IC}_{50}$  values were calculated using KaleidaGraph 3.6 (Synergy Software, Reading, PA).

**Mode of inhibition Study.** The mode of inhibition studies followed the procedure described in our previous work.<sup>5</sup> Description is provided in Supplementary material (Section-2). The concentration of PSMA (2.5 $\mu\text{g}/\text{mL}$ ) was 100-fold greater than used in the typical enzyme activity assays. The enzyme was pre-incubated for 10 minutes with 0.1  $\mu\text{M}$  of inhibitor (40  $\mu\text{L}$ ), at approximately 10-fold greater than the  $\text{IC}_{50}$  value. The solution was diluted with 1 mM of substrate in 50 mM tris + 1% triton buffer (100-fold, total volume 3960  $\mu\text{L}$ ). The formation of product was monitored every 5 minutes for 1 hour. A control sample was defined as incubation described here without inhibitor.

### Section 3: Crystallographic studies - Structure determination and refinement.

**Table S1.** Data collection and refinement statistics

| Data collection statistics                              |                          |                          |
|---------------------------------------------------------|--------------------------|--------------------------|
| Inhibitor                                               | <b>4</b>                 | <b>6</b>                 |
| PDB code                                                | <b>4LQG</b>              | ---                      |
| Wavelength (Å)                                          | 0.918                    | 0.918                    |
| Space group                                             | I222                     | I222                     |
| Unit-cell parameters <i>a</i> , <i>b</i> , <i>c</i> (Å) | 101.9, 130.3, 158.3      | 100.4, 130.5, 157.6      |
| Resolution limits (Å)                                   | 50-1.77 (1.87-1.77)      | 50-1.71 (1.81-1.71)      |
| Number of unique reflections                            | 102,407 (15967)          | 111,302 (17797)          |
| Redundancy                                              | 4.15 (4.14)              | 5.82 (5.80)              |
| Completeness (%)                                        | 99.4% (97.4%)            | 99.7% (99.4%)            |
| <i>I</i> / $\sigma$ <i>I</i>                            | 13.47 (2.36)             | 23.42 (3.60)             |
| R <sub>merge</sub>                                      | 0.093 (0.693)            | 0.052 (0.551)            |
| Refinement Statistics                                   |                          |                          |
| Resolution limits (Å)                                   | 19.51-1.77 (1.811-1.766) | 29.25-1.71 (1.754-1.710) |
| Total number of reflections                             | 97,284 (7,086)           | 105,653 (7,750)          |
| Number of reflections in working set                    | 92,164 (6,731)           | 100,093 (7,342)          |
| Number of reflections in test set                       | 5,120 (355)              | 5,560 (408)              |
| R/R <sub>free</sub> (%)                                 | 15.9/18.2                | 16.3/18.0                |
| Total number of non-H atoms                             | 6791                     | 6438                     |
| Number of non-H protein atoms                           | 5923                     | 5791                     |
| Number Inhibitor molecules                              | 1                        | 1                        |
| Number of water molecules                               | 591                      | 409                      |
| Average B-factor (Å <sup>2</sup> )                      | 13.7                     | 16.8                     |
| Protein atoms                                           | 12.2                     | 15.6                     |
| Waters                                                  | 20.8                     | 22.2                     |
| Inhibitor                                               | 31.8                     | 63.7                     |
| &Ramachandran Plot (%)                                  |                          |                          |
| Most favored                                            | 97.4                     | 97.8                     |
| Additionally allowed                                    | 2.5                      | 2.1                      |
| Disallowed                                              | 0.1                      | 0.1                      |
| R.m.s. deviations: bond lengths (Å)                     | 0.019                    | 0.016                    |
| bond angles (°)                                         | 1.7                      | 1.5                      |
| planarity (Å)                                           | 0.009                    | 0.009                    |
| chiral centers (Å <sup>3</sup> )                        | 0.1                      | 0.1                      |
| Missing residues                                        | 545-546, 654- 655        | 654-655                  |

\* Values in parenthesis are for the highest resolution shells.

& Structures were analyzed using the MolProbity package

## REFERENCES

1. Liu, T.; Wu, L. Y.; Kazak, M.; Berkman, C. E. Cell-Surface labeling and internalization by a fluorescent inhibitor of prostate-specific membrane antigen. *Prostate* **2008**, *68*, 955-964.
2. Wu, L. Y.; Anderson, M. O.; Toriyabe, Y.; Maung, J.; Campbell, T. Y.; Tajon, C.; Kazak, M.; Moser, J.; Berkman, C. E. The molecular pruning of a phosphoramidate peptidomimetic inhibitor of prostate-specific membrane antigen. *Bioorg Med Chem* **2007**, *15*, 7434-7443.
3. Anderson, M. O.; Wu, L. Y.; Santiago, N. M.; Moser, J. M.; Rowley, J. A.; Bolstad, E. S.; Berkman, C. E. Substrate specificity of prostate-specific membrane antigen. *Bioorg Med Chem* **2007**, *15*, 6678-6686.
4. Maung, J.; Mallari, J. P.; Girtsman, T. A.; Wu, L. Y.; Rowley, J. A.; Santiago, N. M.; Brunelle, A. N.; Berkman, C. E. Probing for a hydrophobic a binding register in prostate-specific membrane antigen with phenylalkylphosphonamides. *Bioorg Med Chem* **2004**, *12*, 4969-4979.
5. Liu, T.; Toriyabe, Y.; Kazak, M.; Berkman, C. E. Pseudoirreversible Inhibition of Prostate-Specific Membrane Antigen by Phosphoramidate Peptidomimetics. *Biochemistry* **2008**, *47*, 12658-12660.
